# Supplementary material for: BMAL1-TTK-H2Bub1 loop deficiency contributes to impaired BM-MSC-mediated bone formation in senile osteoporosis
Source: PubMed Central journal article supplement — Mol Ther Nucleic Acids. 2023 Feb 16;31:568–85. doi: 10.1016/j.omtn.2023.02.014 (PMC9996134; doi:10.1016/j.omtn.2023.02.014), 2023-02-16
Supplement: mmc1.pdf [file mmc1.pdf]

**Supplemental information**

**BMAL1-TTK-H2Bub1 loop deficiency  
contributes to impaired BM-MSK-mediated  
bone formation in senile osteoporosis**

**Li Jinteng, Xu Peitao, Yu Wenhui, Ye Guiwen, Ye Feng, Xu Xiaojun, Su Zepeng, Lin Jiajie, Che Yunshu, Zhang Zhaoqiang, Zeng Yipeng, Li Zhikun, Feng Pei, Cao Qian, Li Dateng, Xie Zhongyu, Wu Yanfeng, and Shen Huiyong**

**Supplemental Materials:**

**Table S1** Sequences for Sh-RNA, qPCR primer and CUT&Tag-qPCR primer.

| Lentiviruses encoding short hairpin RNA | <b>Sequences for Sh-RNA(5' - 3')</b> |                          |
|-----------------------------------------|--------------------------------------|--------------------------|
| NC                                      | TTCTCCGAACGTGTCACGTTTC               |                          |
| BMAL1                                   | GCCGAATGATTGCTGAGGAAA                |                          |
| CLOCK                                   | GCCAAGATTCTGGGTCAGATA                |                          |
| TTK                                     | CCAGTTGTAAAGAATGACTTT                |                          |
| RNF40                                   | GCAGCTTAACTCTGGCTACTA                |                          |
| WAC                                     | CTCAAATAACACAGTCCCTA                 |                          |
| MDM2                                    | GATTCCAGAGAGTCATGTGTT                |                          |
| qPCR primer                             |                                      |                          |
| BMAL1                                   | Forward Primer                       | AAGGGAAGCTCACAGTCAGAT    |
|                                         | Reverse Primer                       | GGACATTGCGTTGCATGTTGG    |
| CLOCK                                   | Forward Primer                       | TGCGAGGAACAATAGACCCAA    |
|                                         | Reverse Primer                       | ATGGCCTATGTGTGCGTTGTA    |
| RUNX2                                   | Forward Primer                       | TGGTTACTGTCATGGCGGGTA    |
|                                         | Reverse Primer                       | TCTCAGATCGTTGAACCTTGCTA  |
| OSX                                     | Forward Primer                       | CCTCTGCGGGACTCAACAAC     |
|                                         | Reverse Primer                       | AGCCCATTAGTGCTTGTAAGG    |
| OPN                                     | Forward Primer                       | CTCCATTGACTCGAACGACTC    |
|                                         | Reverse Primer                       | CAGGTCTGCGAAACTTCTTAGAT  |
| OCN                                     | Forward Primer                       | CACTCCTCGCCCTATTGGC      |
|                                         | Reverse Primer                       | CCCTCCTGCTTGGACACAAAG    |
| CUT&Tag-qPCR primer                     |                                      |                          |
| TTK Ebox1                               | Forward Primer                       | GGTTCTAAGGATAGCTTTGGAGTT |
|                                         | Reverse Primer                       | TAGGACGGGTGGTTTTGTGT     |
| TTK Ebox2                               | Forward Primer                       | CCCGCGAAGATTATTACTAGGG   |
|                                         | Reverse Primer                       | TCGAAGCCTGCCCACTTA       |
| TTK control                             | Forward Primer                       | TTAGGGTGAGGTCATCCAGCA    |
|                                         | Reverse Primer                       | TTGATCTGTTTGCGGCCTGAT    |
| RUNX2                                   | Forward Primer                       | GGCTGTCTCTACTCACGAGC     |
|                                         | Reverse Primer                       | GGCTGCTGCGTCATCTTTTT     |
| OSX                                     | Forward Primer                       | TCCCCGTGTGGGCTTTAATC     |
|                                         | Reverse Primer                       | GCACTGGCTCACATCTTCCT     |
| BMAL1 A                                 | Forward Primer                       | GGAGTCAGGAACTGCTGCTT     |
|                                         | Reverse Primer                       | CTGCTACTTTCCTGCCACCA     |
| BMAL1 B                                 | Forward Primer                       | GGTCTGTTTGTGCAGCCAAG     |

|         |                |                         |
|---------|----------------|-------------------------|
|         | Reverse Primer | TCAAGCCCAACACAACCTGT    |
| BMAL1 C | Forward Primer | CTTCCTTCTTCCTCCGCTGT    |
|         | Reverse Primer | AGACAAAAAGAGGCAGAGAGGTT |
| BMAL1 D | Forward Primer | CACCCAGCAGTGCTTATCA     |
|         | Reverse Primer | TCCGTGGAGTAGGACTGGAG    |
| BMAL1 E | Forward Primer | CCACCCCACTCTTCAATCCC    |
|         | Reverse Primer | ATGTGCTTAGTGGCAGGGTC    |
| BMAL1 F | Forward Primer | GCGGATTTCCCATGAATGC     |
|         | Reverse Primer | CCACTAGCCAACACAGGAGG    |

**Table S2** Characteristics of the study subjects

|                                       | Young patients with<br>traffic injuries | Patients with senile<br>osteoporosis |
|---------------------------------------|-----------------------------------------|--------------------------------------|
| Number                                | 3                                       | 3                                    |
| Sex                                   | Male                                    | Male                                 |
| Age, years                            | 30.54±7.30                              | 80.21±8.67*                          |
| Height (cm)                           | 172.77±6.23                             | 168.23±5.05                          |
| Weight (kg)                           | 65.23±9.41                              | 60.34±8.31                           |
| Lumbar spine BMD (g/cm <sup>2</sup> ) | 1.27±0.14                               | 0.69±0.13*                           |
| Lumbar spine <i>T</i> score           | 0.35±1.81                               | -2.90±1.22*                          |
| Total hip BMD (g/cm <sup>2</sup> )    | 1.10±0.17                               | 0.72±0.16*                           |
| Total hip <i>T</i> score              | 0.33±1.69                               | -1.78±0.93*                          |

Data are shown in the form of the mean ± SD, n=3 in each group. P values for all variables are the result of independent t tests between the control and osteoporosis groups, \* indicates P < 0.05 compared with the control group. BMD: bone mineral density.

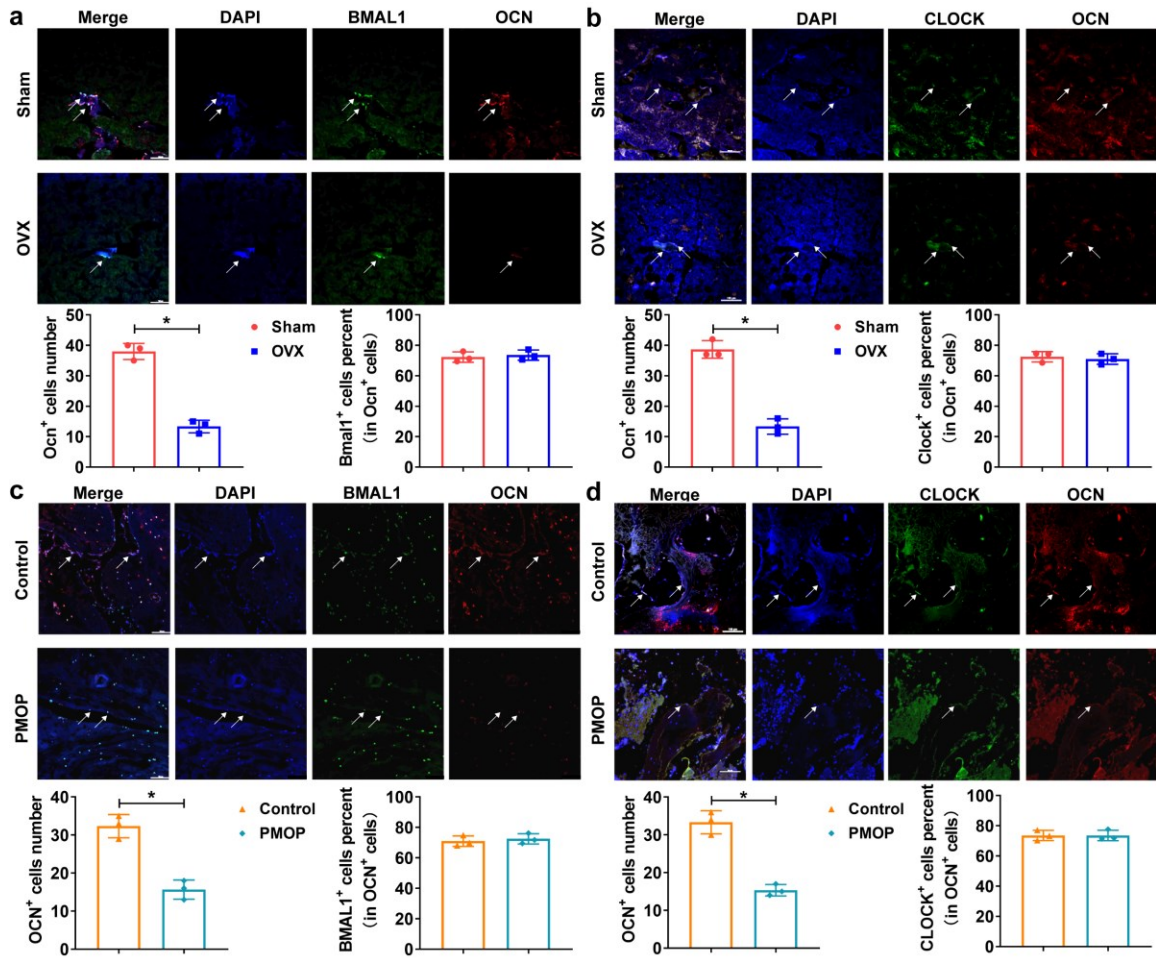

**Fig. S1** BMAL1 expression in the skeletal system in postmenopausal osteoporosis. (a-b) Immunofluorescence staining (scale bar =100  $\mu$ m) showed Bmal1 and Clock expression in the Ocn<sup>+</sup> osteoblast lineage in the sham-operated and OVX mice (white arrows). (c-d) Immunofluorescence staining (scale bar =100  $\mu$ m) showed BMAL1 and CLOCK expression in the OCN<sup>+</sup> osteoblast lineage in age-matched controls and patients with postmenopausal osteoporosis (white arrows).

a

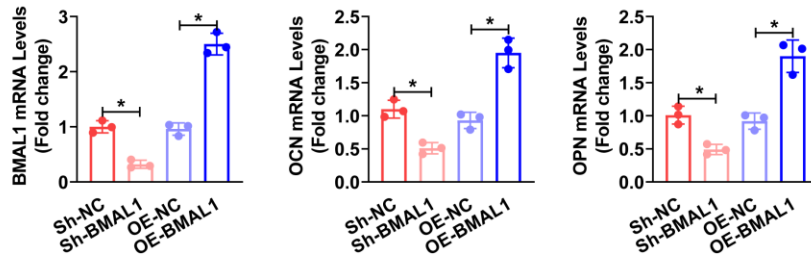

b

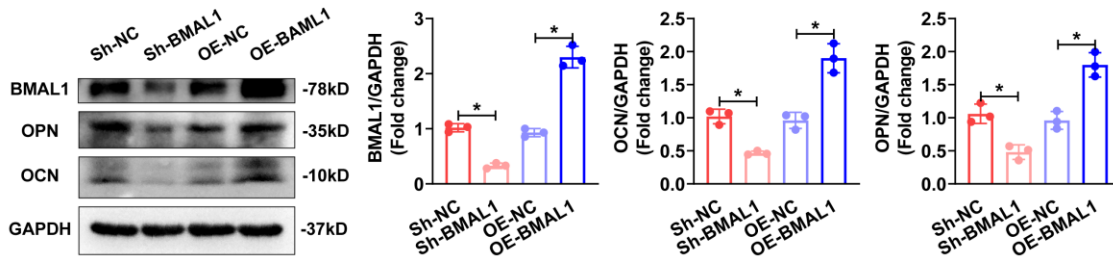

**Fig. S2** BMAL1 positively regulated the osteogenic differentiation of MSCs. (a, b)

Relative mRNA (a) and protein (b) expression of BMAL1 and the osteogenesis-associated markers OPN and OCN in the MSCs infected with Sh-NC, Sh-BMAL1, OE-NC, or OE-BMAL1 lentiviruses on the 10th day of osteogenic differentiation. The data are presented as the means  $\pm$  SDs,  $n = 3$ , \* $P < 0.05$ .

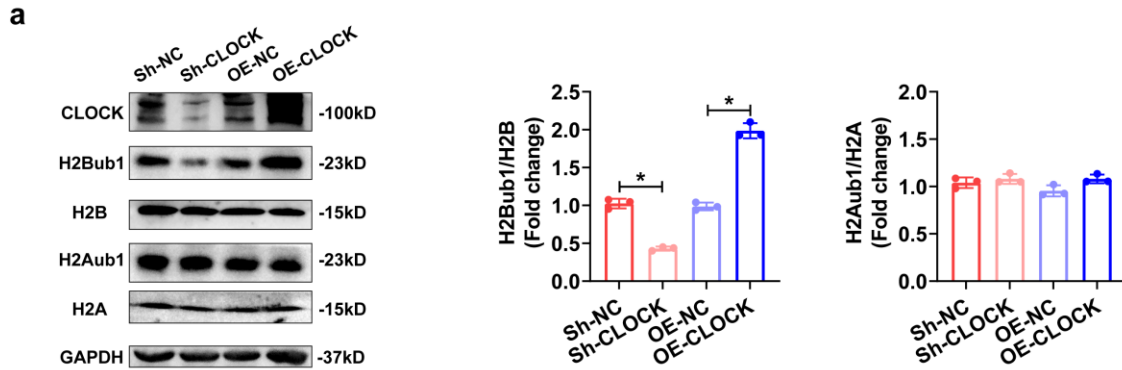

**Fig. S3** The core circadian component CLOCK regulated histone H2B

monoubiquitination levels. (a) H2Bub1 and H2Aub1 levels in the MSCs infected with Sh-NC, Sh-BMAL1, or Sh-CLOCK lentiviruses on the 10th day of osteogenic differentiation. H2B and H2A served as the internal controls. Bar graphs showing the relative levels. The data are presented as the means  $\pm$  SDs,  $n = 3$ , \* $P < 0.05$ .

a

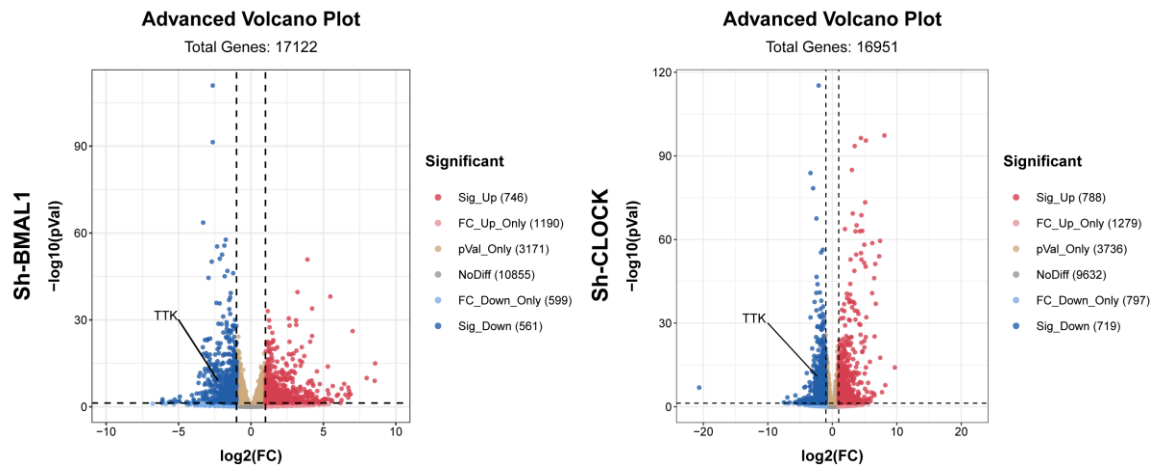

**Fig. S4** The core circadian components BMAL1 and CLOCK regulated TTK expression.

(a) Volcano plot showing the significantly differentially expressed gene, and TTK, the regulator of histone H2B monoubiquitination, is marked.



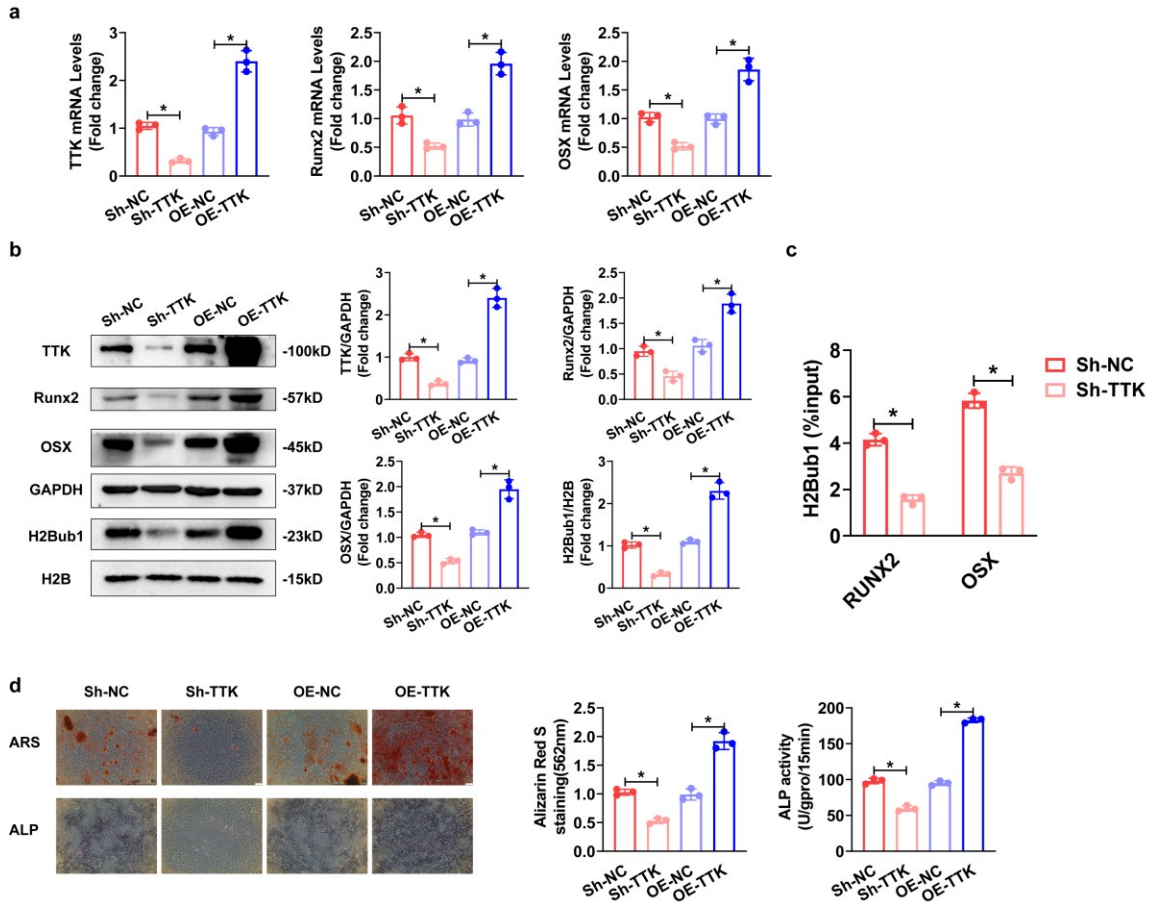

**Fig. S5** TTK positively regulated the osteogenic differentiation of MSCs. (a, b) Relative mRNA (a) and protein (b) expression of TTK and the osteogenesis-associated markers RUNX2 and OSX in the MSCs infected with Sh-NC, Sh-TTK, OE-NC, or OE-TTK lentiviruses on the 10th day of osteogenic differentiation. (c) CUT&Tag-qPCR analysis showing that H2Bub1 occupancy on RUNX2 and OSX decreased in the MSCs while TTK expression was reduced. (d) ARS and ALP staining of the MSCs infected with Sh-NC, Sh-TTK, OE-NC, or OE-TTK lentiviruses on the 14th day of osteogenic differentiation. The data are presented as the means  $\pm$  SDs,  $n = 3$ ,  $*P < 0.05$ .

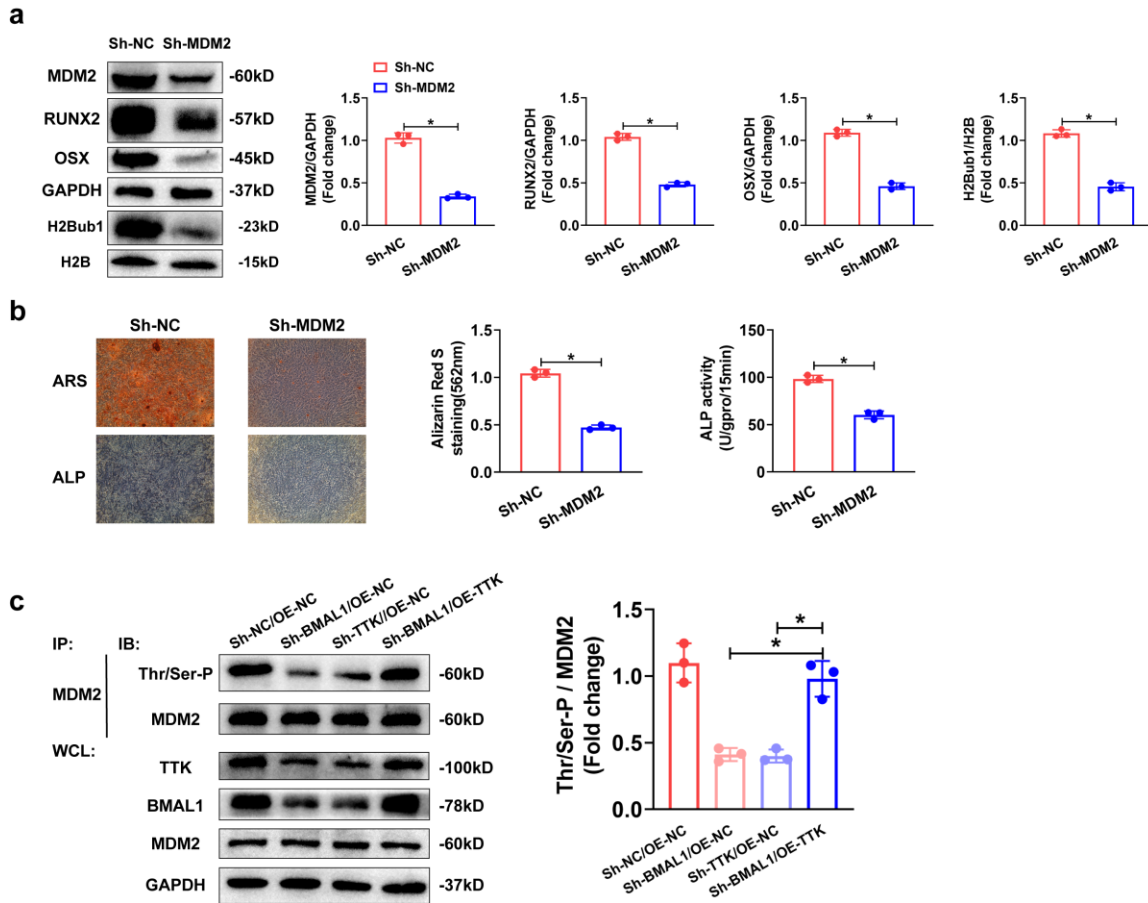

**Fig. S6** MDM2 is part of the BMAL1-TTK-H2Bub1 axis, which regulates the osteogenic differentiation of MSCs. (a) Expression of MDM2 and the osteogenesis-associated markers RUNX2 and OSX in the MSCs infected with Sh-NC or Sh-MDM2 lentiviruses on the 10th day of osteogenic differentiation. (b) ARS and ALP staining of the MSCs infected with Sh-NC or Sh-MDM2 lentiviruses on the 14th day of osteogenic differentiation. (c) Co-IP/western blot assays showing that BAML1 regulates TTK expression to modulate MDM2 phosphorylation and ultimately regulate H2Bub1 level. All data are presented as the means  $\pm$  SDs,  $n = 3$ ,  $*P < 0.05$ .

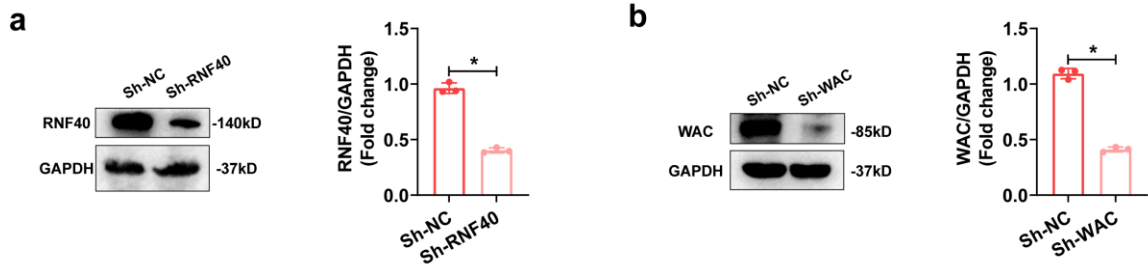

**Fig. S7** Effect of Sh-RNF40 or Sh-WAC. (a, b) Protein expression of RNF40 and WAC

in the MSCs infected with Sh-NC, Sh-RNF40 or Sh-WAC lentiviruses.

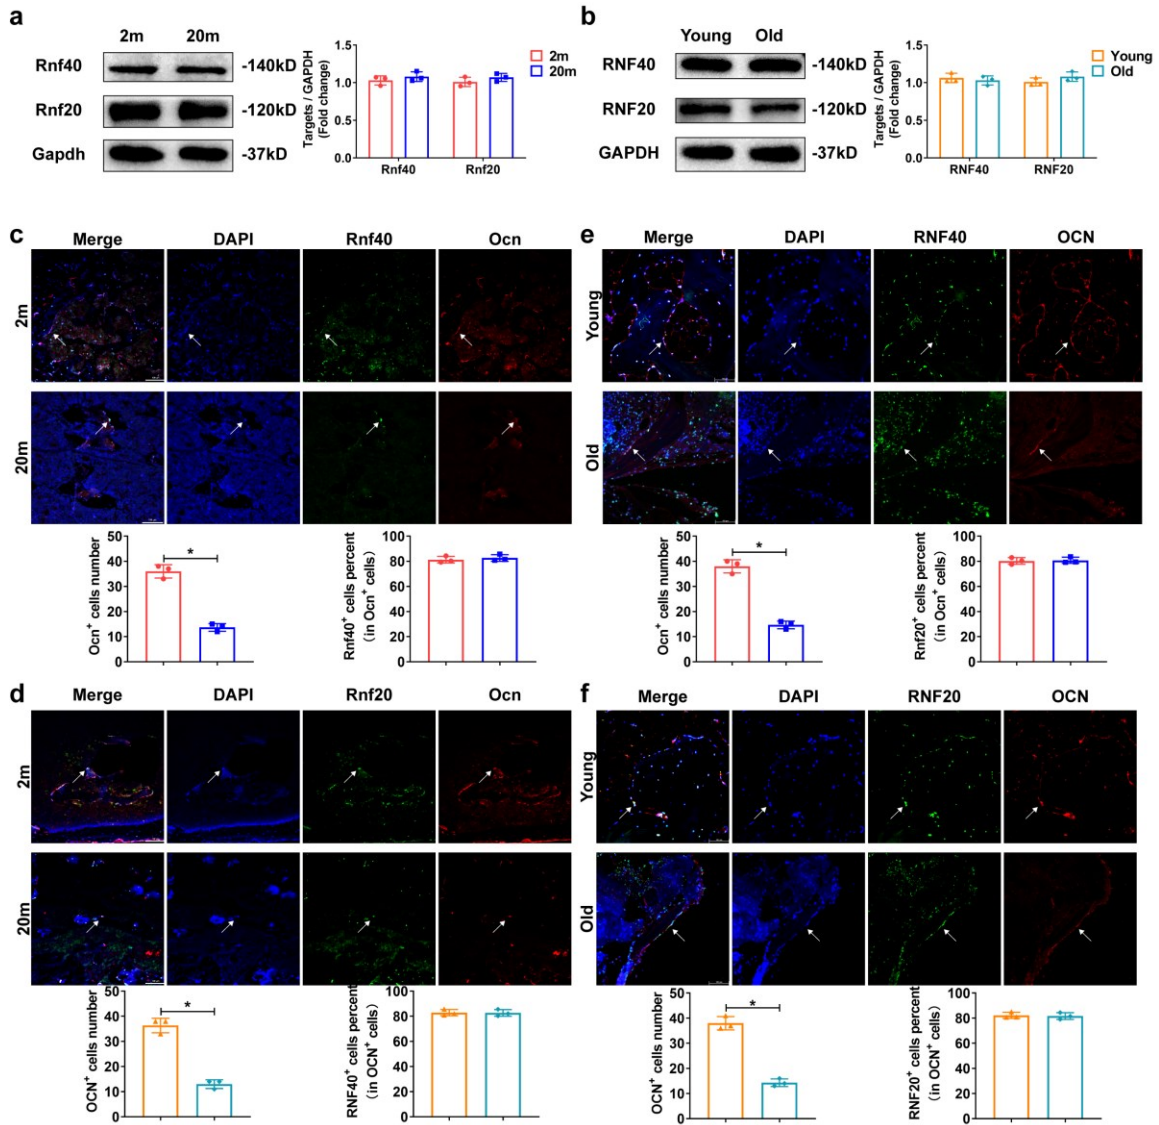

**Fig. S8** RNF20/40 expression in BM-MSCs did not significantly differ between young stages and senile osteoporosis. (a-b) Western blot analysis of the expression of RNF20 and RNF40 in BM-MSCs from 2-month-old and 20-month-old mice, patients with traffic injuries and patients with senile osteoporosis. (c-d) Immunofluorescence staining (scale bar =100  $\mu$ m) showing Rnf20 and Rnf40 expression in the Ocn<sup>+</sup> osteoblast lineage in 2-month-old and 20-month-old mice (white arrows). (e-f) Immunofluorescence staining (scale bar =100  $\mu$ m) showing RNF20 and RNF40 expression in the OCN<sup>+</sup> osteoblast

lineage in young patients with traffic injuries and patients with senile osteoporosis (white arrows). All data are presented as the means  $\pm$  SDs, n = 3, \*P < 0.05.

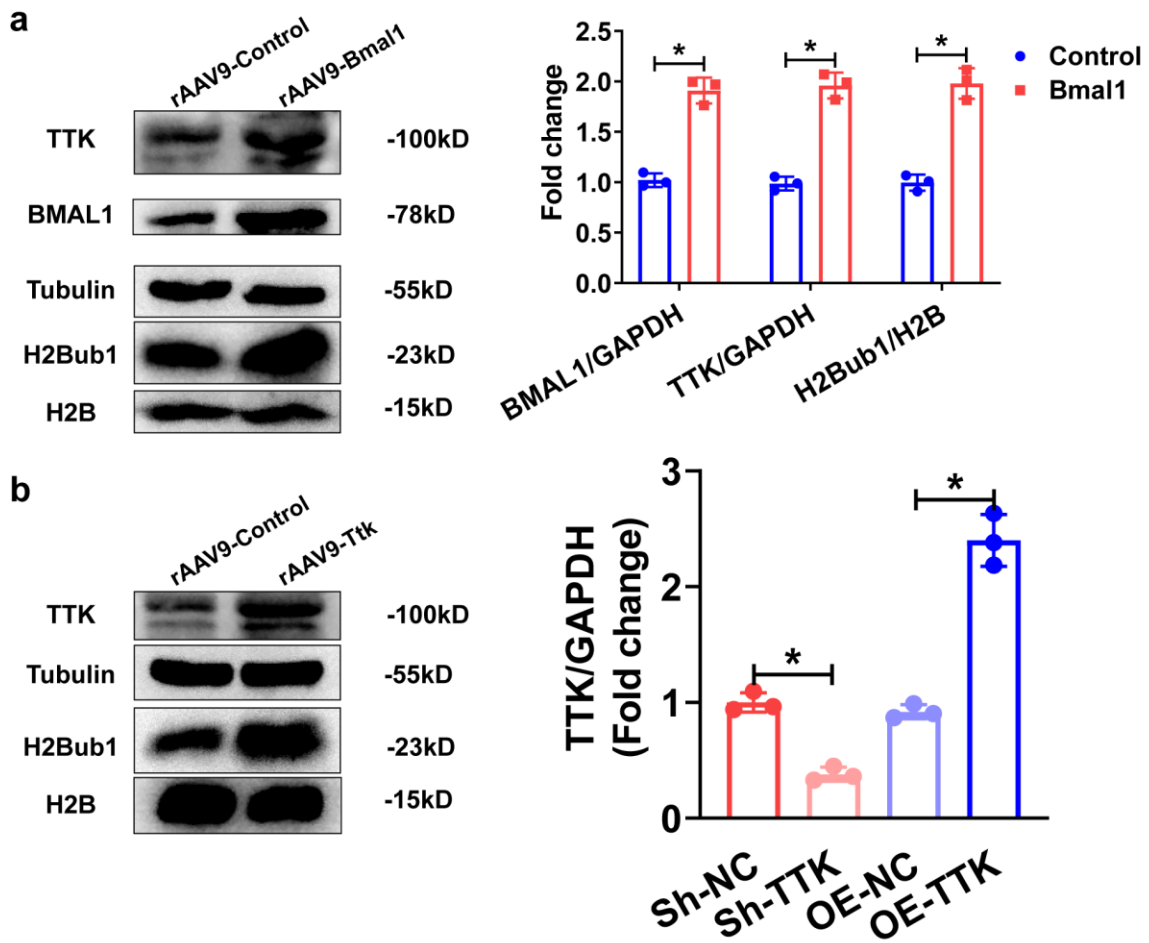

**Fig. S9** Bone-targeted Bmal1 or Ttk rescue increased H2bub1 levels. (a) Immunoblot analysis showing Bmal1 and Ttk expression and H2Bub1 levels in the femoral tissue from the mice injected with rAAV9-control or rAAV9-Bmal1. (b) Immunoblot analysis showing Ttk expression and H2Bub1 levels in the femoral tissue from the mice injected with rAAV9-control or rAAV9-Ttk. The data are presented as the means  $\pm$  SDs,  $n = 3$ , \* $P < 0.05$ .
